# Supplementary material for: Multiple Isoforms of Anti-Lipopolysaccharide Factors and Their Antimicrobial Functions in the Ridgetail Prawn Exopalaemon carinicauda
Source: PubMed Central journal article supplement (PMC5983276; doi:10.3390/md16050145), 2018-04-27
Supplement: marinedrugs-16-00145-s001.pdf [file marinedrugs-16-00145-s001.pdf]

## Supplementary Tables

**Supplementary Table 1** Primer sequences and corresponding annealing temperature of genes

| Primer name | Primer sequence (5'-3')                    | Annealing temperature (°C) |
|-------------|--------------------------------------------|----------------------------|
| EcALF2F     | CAATTCGCATCAGGCAATGCG                      | 60                         |
| EcALF2R     | GCTTTCAGATAGCTAAAGGAAATG                   |                            |
| EcALF3F     | GAATCTTGACTTCGCTGCTCTA                     | 60                         |
| EcALF3R     | CCTTTGGCTGATTATTTGAACC                     |                            |
| EcALF4F     | ACGCATCTTTCATTTCTGTCTG                     | 58                         |
| EcALF4R     | TTGTCGTAATGGAGAGCAACTA                     |                            |
| EcALF5F     | CAACTCTCAAGTTCAACCGCAG                     | 60                         |
| EcALF5R     | CCATACCAGTCACATTCTAAGC                     |                            |
| qEcALF2F    | CCCAAAACAGACGCACAAGA                       | 55                         |
| qEcALF2R    | CCAACCAGGACACCAAAATG                       |                            |
| qEcALF3F    | GCGTCCTTCAACCTGCTTCTT                      | 53                         |
| qEcALF3R    | CTGAGCCCCATAATCCAACAA                      |                            |
| qEcALF4F    | TTGCCTCGTTTTCATCCTCT                       | 52                         |
| qEcALF4R    | TTCTTTGCCCTGCCAATAATAG                     |                            |
| qEcALF5F    | AATGGCGTCGGCTATGTTGA                       | 55                         |
| qEcALF5R    | TGACCTCCGCTCTGTAATGC                       |                            |
| 18S-F       | TATACGCTAGTGGAGCTGGAA                      | 55                         |
| 18S-R       | GGGGAGGTAGTGACGAAAAAT                      |                            |
| VP28-qF     | AAACCTCCGCATTCTGTGA                        | 55                         |
| VP28-qR     | TCCGCATCTTCTTCCTTCAT                       |                            |
| dsEcALF2F   | TAATACGACTCACTATAGGGCAATTTTCGCATCAGGCAATG  | 60                         |
| dsEcALF2R   | TAATACGACTCACTATAGGGCTTAATTCTTGCTTTCAGAT   |                            |
| dsEcALF3F   | TAATACGACTCACTATAGGGGAGTGAACGTAAGAAAGTGT   | 60                         |
| dsEcALF3R   | TAATACGACTCACTATAGGGATGCCCTTTGGCTGATTATTT  |                            |
| dsEcALF4F   | TAATACGACTCACTATAGGGACGCATCTTTCATTTCTGTC   | 60                         |
| dsEcALF4R   | TAATACGACTCACTATAGGGGTTCAAATCCTCAGTCAAGC   |                            |
| dsEcALF5F   | TAATACGACTCACTATAGGGATCCGAGACAAGAACTCCCC   | 60                         |
| dsEcALF5R   | TAATACGACTCACTATAGGGTGTGACGCCAACTTCACAAC   |                            |
| dsEGFP-F    | TAATACGACTCACTATAGGGCAGTGCTTCAGCCGCTACCC   | 60                         |
| dsEGFP-R    | TAATACGACTCACTATAGGGAGTTCACCTTGATGCCGTTCTT |                            |
| 27F         | AGAGTTTGATCMTGGCTCAG                       | 55                         |
| 1492R       | TACGGYTACCTTGTTACGACTT                     |                            |

**Supplementary Table 2** Protein information of ALFs used in the present study

| Gene name | Accession number | Species                          |
|-----------|------------------|----------------------------------|
| MnALF1    | ALF02818.1       | <i>Macrobrachium nipponense</i>  |
| MrALF1    | AFW04304.1       | <i>Macrobrachium rosenbergii</i> |
| MnALF2    | ALF02817.1       | <i>Macrobrachium nipponense</i>  |
| MrALF2    | ADI80707.1       | <i>Macrobrachium rosenbergii</i> |
| HaALF2    | ACC94269.1       | <i>Homarus americanus</i>        |
| MjALFC2   | AME17862.1       | <i>Marsupenaeus japonicus</i>    |
| FcALF2    | AFU61125.1       | <i>Fenneropenaeus chinensis</i>  |
| PmALF6    | ADM21460.1       | <i>Penaeus monodon</i>           |
| PmALF7    | ANP92039.2       | <i>Penaeus monodon</i>           |
| FcALF3    | AFU61126.1       | <i>Fenneropenaeus chinensis</i>  |
| FcALF6    | AFU61129.1       | <i>Fenneropenaeus chinensis</i>  |
| PmALF2    | ABP73291.1       | <i>Penaeus monodon</i>           |
| FcALF4    | AFU61127.1       | <i>Fenneropenaeus chinensis</i>  |
| FiALF     | ADE27980.1       | <i>Fenneropenaeus indicus</i>    |
| PmALF3    | ABP73289.1       | <i>Penaeus monodon</i>           |
| HaALF1    | ACC94268.1       | <i>Homarus americanus</i>        |
| MjALF2    | BAH22585.1       | <i>Marsupenaeus japonicus</i>    |
| MrALF3    | ADI80708.1       | <i>Macrobrachium rosenbergii</i> |
| MrALF5    | AOF80307.1       | <i>Macrobrachium rosenbergii</i> |
| MnALF5    | ALF02821.1       | <i>Macrobrachium nipponense</i>  |
| MrALF4    | AOF80306.1       | <i>Macrobrachium rosenbergii</i> |
| PrALF5    | AFA42333.1       | <i>Portunus trituberculatus</i>  |
| PtALF4    | AFA42332.1       | <i>Portunus trituberculatus</i>  |
| FcALF5    | AFU61128.1       | <i>Fenneropenaeus chinensis</i>  |
| SpALF     | AHB62419.1       | <i>Scylla paramamosain</i>       |
| LsALF     | ABJ90465.1       | <i>Litopenaeus schmitti</i>      |
| LsALFB1   | AGH32549.1       | <i>Litopenaeus stylirostris</i>  |
| EsALF3    | ADZ46233.1       | <i>Eriocheir sinensis</i>        |
| LvALFAV-R | ABB22832.1       | <i>Litopenaeus vannamei</i>      |
| LvALFAA-K | ABB22833.1       | <i>Litopenaeus vannamei</i>      |
| LvALFAV-K | ACT21197.1       | <i>Litopenaeus vannamei</i>      |

**Supplementary Table 3 Information of HPLC analysis**

|                              |                                                                                    |
|------------------------------|------------------------------------------------------------------------------------|
| HPLCsystem                   | Agilent 1100                                                                       |
| column                       | Gemini-NX 5 $\mu$ C18 110A, 4.6*250mm                                              |
| solvent gradient composition | solventA: 0.1% trifluoroacetic in 100% acetonitrile                                |
|                              | solventB: 0.1% trifluoroacetic in 100% water                                       |
|                              | gradient: 0.01min: 25%A, 75%B; 25min: 50%A, 50%B; 25.1min: 100%A, 0%B; 30min: stop |

**Supplementary Table 4 Information of mass analysis**

|                     |               |             |               |
|---------------------|---------------|-------------|---------------|
| Instrument          | Waters ZQ2000 |             |               |
| Probe:              | ESI           | Probe Bias: | +4.5kv        |
| Nebulizer Gas Flow: | 1.5L/min      | Detector:   | 1.5kv         |
| CDL:                | -20.0v        | T. Flow:    | 0.2ml/min     |
| CDL Temp:           | 250 °C        | B. Conc:    | 50%H2O/50%ACN |
| Block Temp:         | 200 °C        |             |               |

**Supplementary Table 5 Purity and mass values of EcLBD peptides**

| Peptide Name | Purity | Molecular Weight |
|--------------|--------|------------------|
| EcLBD2       | 97.63% | 2980.57          |
| EcLBD3       | 95.24% | 3116.76          |
| EcLBD4       | 95.33% | 3131.7           |
| EcLBD5       | 96.33% | 3045.65          |
